# Supplementary material for: Characteristics of Anterior Segment in Congenital Ectopia Lentis: An SS-OCT Study
Source: Hindawi journal article supplement (doi:10.1155/2022/6128832), 2022-06-06

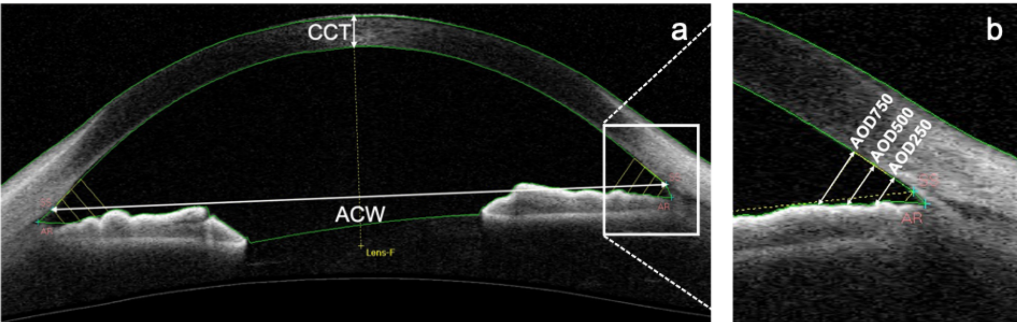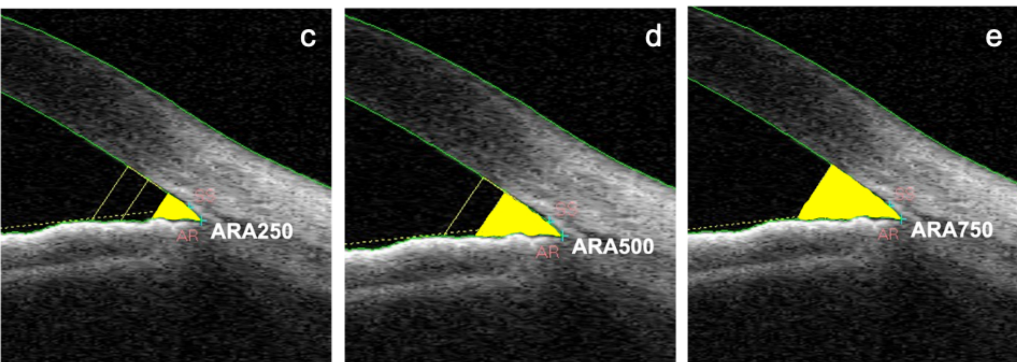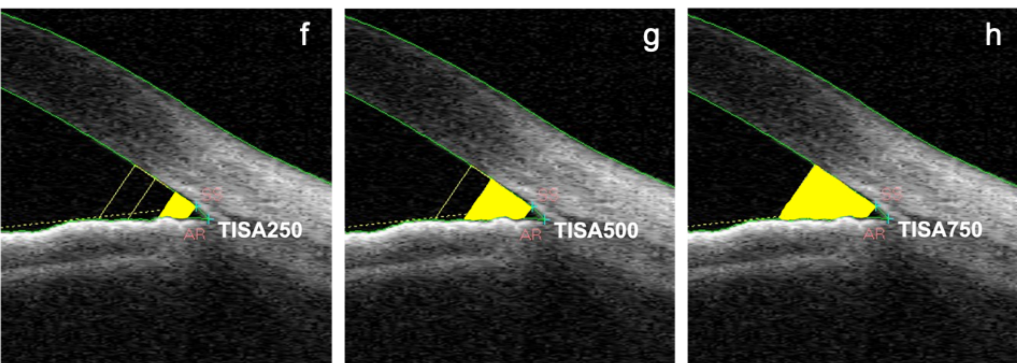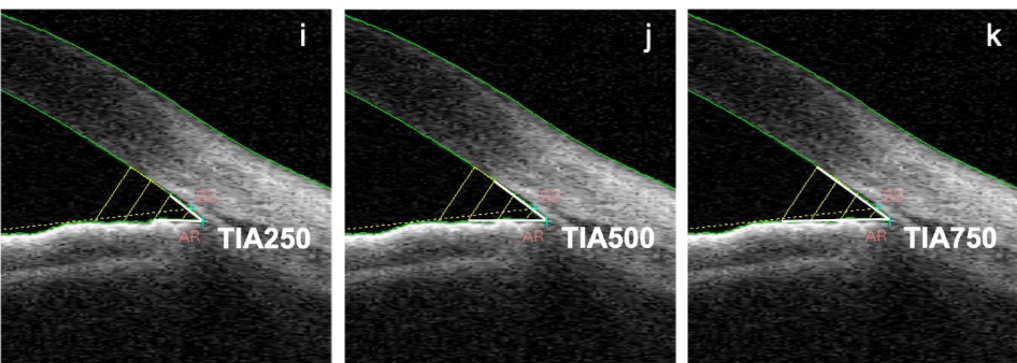

Supplement: f1 [file 6128832.f1.pdf]
